# Supplementary material for: Effectiveness of emergency surgery for five common acute conditions: an instrumental variable analysis of a national routine database
Source: PubMed Central journal article supplement (PMC9540551; doi:10.1111/anae.15730), 2022-05-19

## Appendicitis

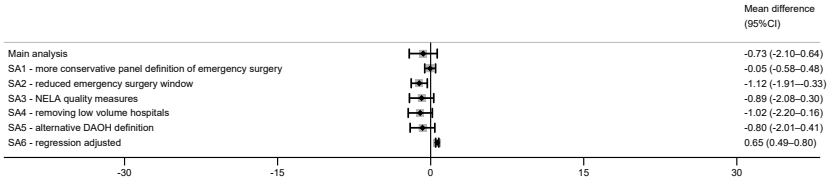

## Gallstone disease

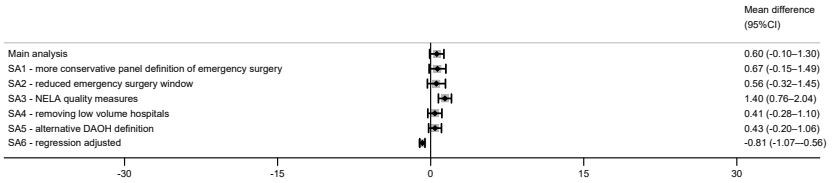

## Diverticular disease

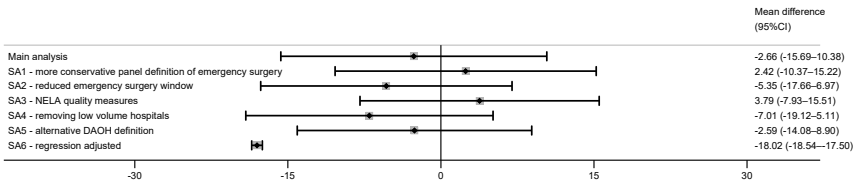

## Hernia

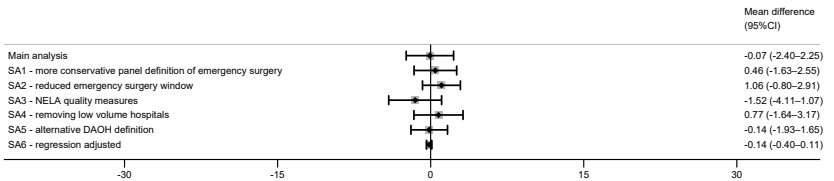

## Intestinal obstruction

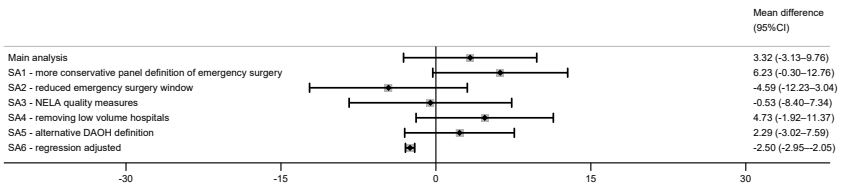

Supplement: ANAE-77-865-s002.pdf [file ANAE-77-865-s002.pdf]
