# Supplementary material for: Effectiveness of emergency surgery for five common acute conditions: an instrumental variable analysis of a national routine database
Source: PubMed Central journal article supplement (PMC9540551; doi:10.1111/anae.15730), 2022-05-19
Supplement: ANAE-77-865-s008.pdf [file ANAE-77-865-s008.pdf]

### Appendicitis

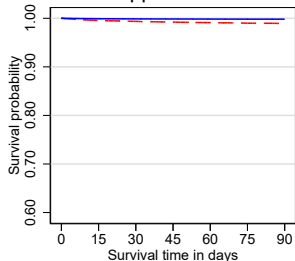

Number at risk

|     | 0       | 15      | 30      | 45      | 60 | 75 | 90 |
|-----|---------|---------|---------|---------|----|----|----|
| NES | 20,638  | 20,509  | 20,456  | 20,417  |    |    |    |
| ES  | 247,506 | 247,218 | 247,118 | 247,051 |    |    |    |

### Gallstone disease

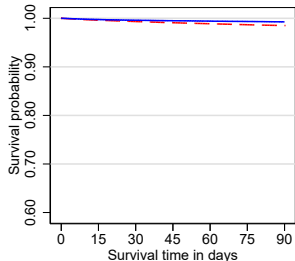

Number at risk

|     | 0       | 15      | 30      | 45      | 60 | 75 | 90 |
|-----|---------|---------|---------|---------|----|----|----|
| NES | 188,973 | 187,734 | 186,870 | 186,150 |    |    |    |
| ES  | 52,004  | 51,800  | 51,704  | 51,625  |    |    |    |

### Diverticular disease

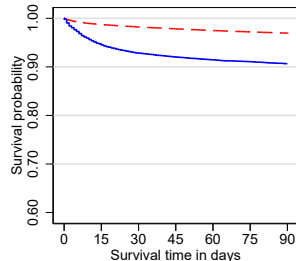

Number at risk

|     | 0       | 15      | 30      | 45      | 60 | 75 | 90 |
|-----|---------|---------|---------|---------|----|----|----|
| NES | 123,097 | 120,920 | 120,008 | 119,353 |    |    |    |
| ES  | 15,772  | 14,646  | 14,427  | 14,299  |    |    |    |

### Hernia

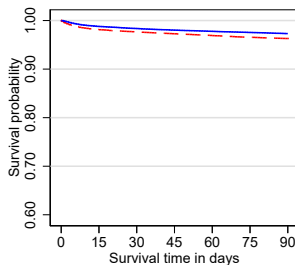

Number at risk

|     | 0      | 15     | 30     | 45     | 60 | 75 | 90 |
|-----|--------|--------|--------|--------|----|----|----|
| NES | 43,873 | 42,847 | 42,527 | 42,251 |    |    |    |
| ES  | 62,559 | 61,541 | 61,173 | 60,882 |    |    |    |

### Intestinal obstruction

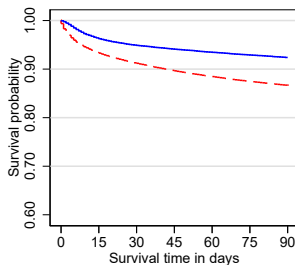

Number at risk

|     | 0      | 15     | 30     | 45     | 60 | 75 | 90 |
|-----|--------|--------|--------|--------|----|----|----|
| NES | 92,523 | 84,473 | 81,904 | 80,222 |    |    |    |
| ES  | 40,550 | 38,503 | 37,915 | 37,468 |    |    |    |

--- Non-emergency surgery (NES)

— Emergency surgery (ES)
